# Supplementary material
Source: publisher figshare collection journal article supplement (https://acs.figshare.com/ndownloader/files/32821676)
Supplement: Supplementary file 1 [file 32821676]

## Supporting information

### **High energy density in combination with high cycling stability in hybrid supercapacitors**

Guang Cong Zhang,<sup>a†</sup> Man Feng,<sup>a†</sup> Qing Li,<sup>b</sup> Zhuang Wang,<sup>a</sup> Zixun Fang,<sup>a</sup> Zhimin Niu,<sup>a</sup>

Nianrui Qu,<sup>a</sup> Xiaoyong Fan,<sup>c</sup> Siheng Li,<sup>d</sup> Jianmin Gu,<sup>a\*</sup> Jidong Wang<sup>a\*</sup> and Desong Wang<sup>a\*</sup>

<sup>a</sup>State Key Laboratory of Metastable Materials Science and Technology (MMST), Hebei Key Laboratory of Applied Chemistry, Hebei Key Laboratory of Heavy Metal Deep-Remediation in Water and Resource Reuse, Yanshan University, Qinhuangdao, P. R. China

<sup>b</sup>College of Chemistry and Pharmaceutical Engineering, Hebei University of Science and Technology, Shijiazhuang, 050018, China

<sup>c</sup>School of Materials Science and Engineering, Chang'an University, Xi'an, 710061, China

<sup>d</sup>Shenzhen Jini New Energy Technology Co., Ltd. 3A19, Duchuang Cloud valley, Luoqu Community, Shiyan, Baoan District, Shenzhen, Guangdong, China

<sup>†</sup>Guang Cong Zhang and Man Feng contributed equally to this work.

## Contents

- i. **Figure S1.** (a-f) The  $N_2$  absorption-desorption isotherm of the prepared LN samples (0.5 LN-15 LN). The insert is its BJH pore-size distribution curve.
- ii. **Figure S2.** The specific capacitance curves of different  $Ni_3 (PO_4)_2 \cdot 8H_2O$  at the current densities of  $0.2 \text{ A g}^{-1}$ .
- iii. **Figure S3.** The CV curves of  $Ni_3 (PO_4)_2 \cdot 8H_2O // C$  (0.5 LN) at scan rates of 5, 10, 20, 30, 40 and  $50 \text{ mV s}^{-1}$ .
- iv. **Figure S4.** The CV curves of  $Ni_3 (PO_4)_2 \cdot 8H_2O // C$  (3 LN) at scan rates of 5, 10, 20, 30, 40 and  $50 \text{ mV s}^{-1}$ .
- v. **Figure S5.** The CV curves of  $Ni_3 (PO_4)_2 \cdot 8H_2O // C$  (6 LN) at scan rates of 5, 10, 20, 30, 40 and  $50 \text{ mV s}^{-1}$ .
- vi. **Figure S6.** The CV curves of  $Ni_3 (PO_4)_2 \cdot 8H_2O // C$  (9 LN) at scan rates of 5, 10, 20, 30, 40 and  $50 \text{ mV s}^{-1}$ .
- vii. **Figure S7.** The CV curves of  $Ni_3 (PO_4)_2 \cdot 8H_2O // C$  (15 LN) at scan rates of 5, 10, 20, 30, 40 and  $50 \text{ mV s}^{-1}$ .
- viii. **Figure S8.** The galvanostatic charge-discharge curves of  $Ni_3 (PO_4)_2 \cdot 8H_2O // C$  (0.5 LN) at the current densities of 0.2, 0.5, 1, 2, 3 and  $5 \text{ A g}^{-1}$ .
- ix. **Figure S9.** The galvanostatic charge-discharge curves of  $Ni_3 (PO_4)_2 \cdot 8H_2O // C$  (3 LN) at the current densities of 0.2, 0.5, 1, 2, 3 and  $5 \text{ A g}^{-1}$ .
- x. **Figure S10.** The galvanostatic charge-discharge curves of  $Ni_3 (PO_4)_2 \cdot 8H_2O // C$  (6 LN) at the current densities of 0.2, 0.5, 1, 2, 3 and  $5 \text{ A g}^{-1}$ .
- xi. **Figure S11.** The galvanostatic charge-discharge curves of  $Ni_3 (PO_4)_2 \cdot 8H_2O // C$  (9 LN) at the current densities of 0.2, 0.5, 1, 2, 3 and  $5 \text{ A g}^{-1}$ .
- xii. **Figure S12.** The galvanostatic charge-discharge curves of  $Ni_3 (PO_4)_2 \cdot 8H_2O // C$  (12 LN) at the current densities of 0.2, 0.5, 1, 2, 3 and  $5 \text{ A g}^{-1}$ .

- xiii. **Figure S13.** (a-b) SEM images of the nickel phosphate before and after charging/discharging for 8000 cycles. Scale bars are 20  $\mu\text{m}$  for (a) and 10  $\mu\text{m}$  for (b).
- xiv. **Table S1.** Cycling stability of half cells with 12 LN  $\text{Ni}_3(\text{PO}_4)_2 \cdot 8\text{H}_2\text{O}$  and recently reported values for comparison.
- xv. **Table S2.** Cycling stability of  $\text{Ni}_3(\text{PO}_4)_2 \cdot 8\text{H}_2\text{O} // \text{AC}$  and recently reported values for comparison

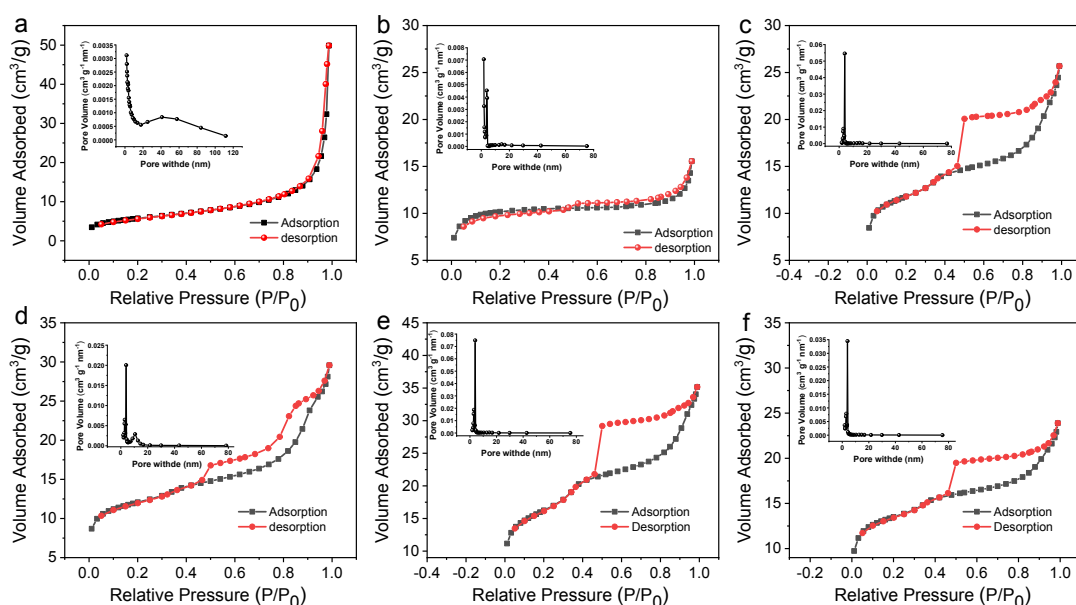

**Figure S1.** (a-f) The  $\text{N}_2$  absorption-desorption isotherm of the prepared LN samples (0.5 LN-15 LN). The insert is its BJH pore-size distribution curve.

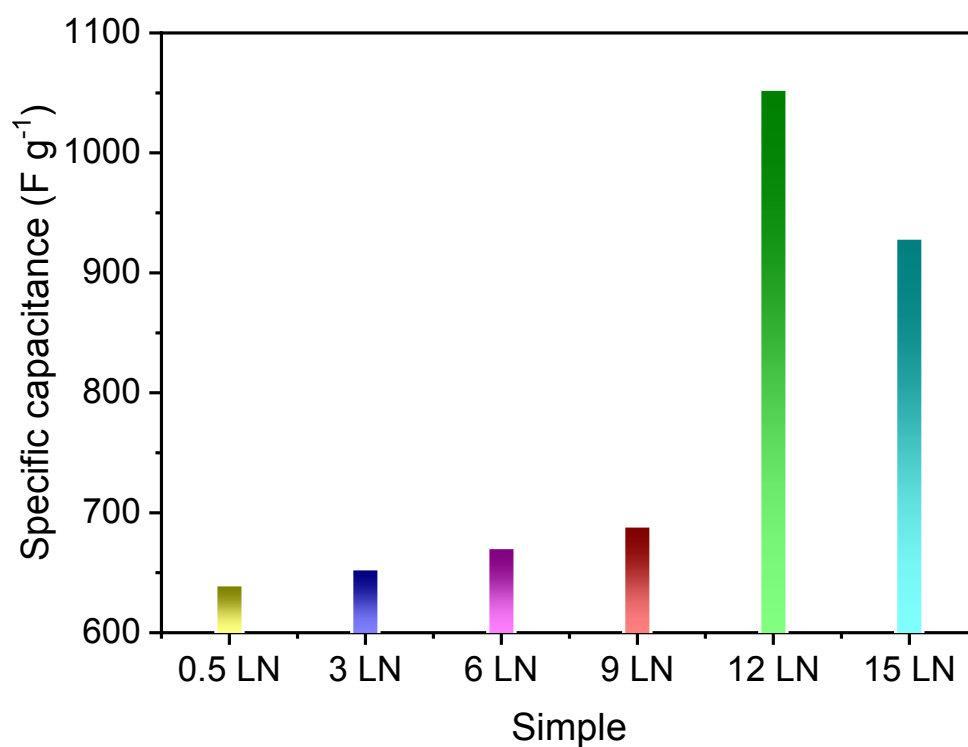

**Figure S2.** The capacitances of nickel phosphate lamination structure with different number of nanosheets at 0.2 A g<sup>-1</sup> current densities.

As the Figure S2 shows, the nickel phosphate lamination assembled with 12 h (12 LN) has the largest specific capacitance. This may be due to the higher number of nickel phosphate nanosheets resulting in more activate material to take part in the redox reaction.

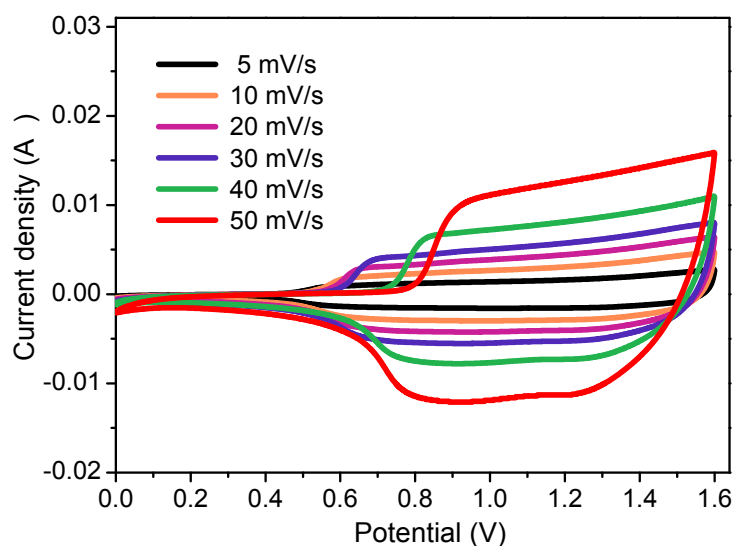

**Figure S3.** The CV curves of  $\text{Ni}_3(\text{PO}_4)_2 \cdot 8\text{H}_2\text{O}/\text{C}$  (0.5 LN) at scan rates of 5, 10, 20, 30, 40 and  $50 \text{ mV s}^{-1}$ .

Figure S3 shows the CV curves of  $\text{Ni}_3(\text{PO}_4)_2 \cdot 8\text{H}_2\text{O}/\text{C}$  (0.5 LN) full device at different scan rates within a cell voltage window of 0-1.6 V. The quasi-rectangular shapes of these CV curves demonstrate the dominant capacitive behavior rather than battery characteristics. The CV curves retain the same shape with increasing scan rate, which exhibited a good rate capability of the hybrid supercapattery.

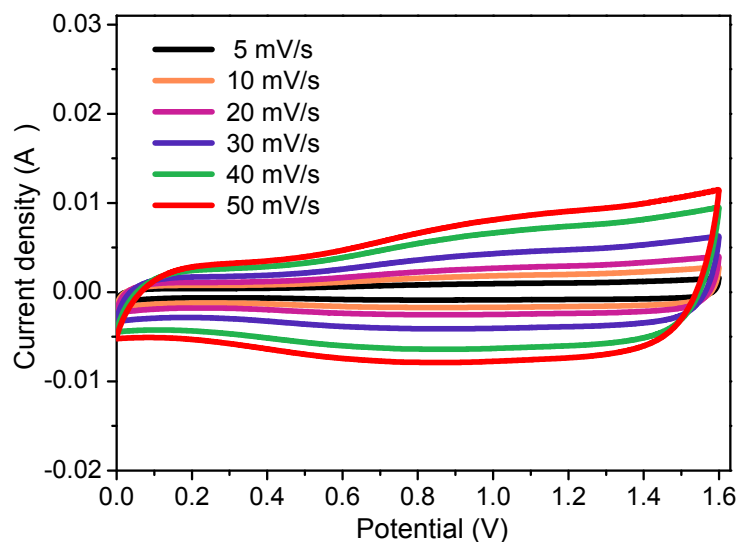

**Figure S4.** The CV curves of  $\text{Ni}_3(\text{PO}_4)_2 \cdot 8\text{H}_2\text{O}/\text{C}$  (3 LN) at scan rates of 5, 10, 20, 30, 40 and  $50 \text{ mV s}^{-1}$ .

Figure S4 shows the CV curves of  $\text{Ni}_3(\text{PO}_4)_2 \cdot 8\text{H}_2\text{O}/\text{C}$  (3 LN) full device at different scan rates within a cell voltage window of 0-1.6 V. The quasi-rectangular shapes of these CV curves demonstrate the dominant capacitive behavior rather than battery characteristics. The CV curves retain the same shape with increasing scan rate, which exhibited a good rate capability of the hybrid supercapattery.

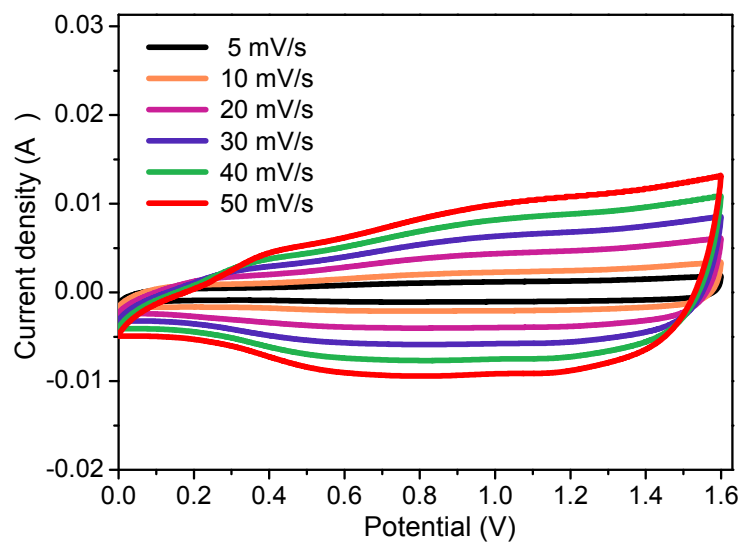

**Figure S5.** The CV curves of  $\text{Ni}_3(\text{PO}_4)_2 \cdot 8\text{H}_2\text{O}/\text{C}$  (6 LN) at scan rates of 5, 10, 20, 30, 40 and 50  $\text{mV s}^{-1}$ .

Figure S5 shows the CV curves of  $\text{Ni}_3(\text{PO}_4)_2 \cdot 8\text{H}_2\text{O}/\text{C}$  (6 LN) full device at different scan rates within a cell voltage window of 0-1.6 V. The quasi-rectangular shapes of these CV curves demonstrate the dominant capacitive behavior rather than battery characteristics. The CV curves retain the same shape with increasing scan rate, which exhibited a good rate capability of the hybrid supercapattery.

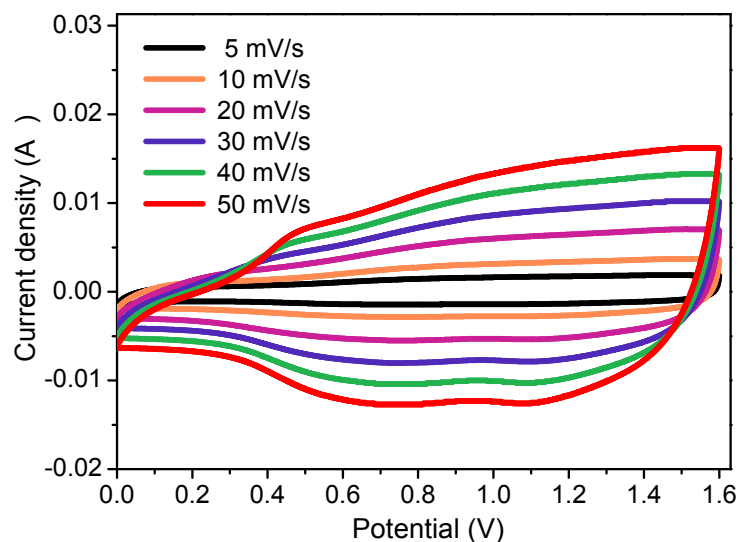

**Figure S6.** The CV curves of  $\text{Ni}_3(\text{PO}_4)_2 \cdot 8\text{H}_2\text{O}/\text{C}$  (9 LN) at scan rates of 5, 10, 20, 30, 40 and 50  $\text{mV s}^{-1}$ .

Figure S6 shows the CV curves of  $\text{Ni}_3(\text{PO}_4)_2 \cdot 8\text{H}_2\text{O}/\text{C}$  (9 LN) full device at different scan rates within a cell voltage window of 0-1.6 V. The quasi-rectangular shapes of these CV curves demonstrate the dominant capacitive behavior rather than battery characteristics. The CV curves retain the same shape with increasing scan rate, which exhibited a good rate capability of the hybrid supercapattery.



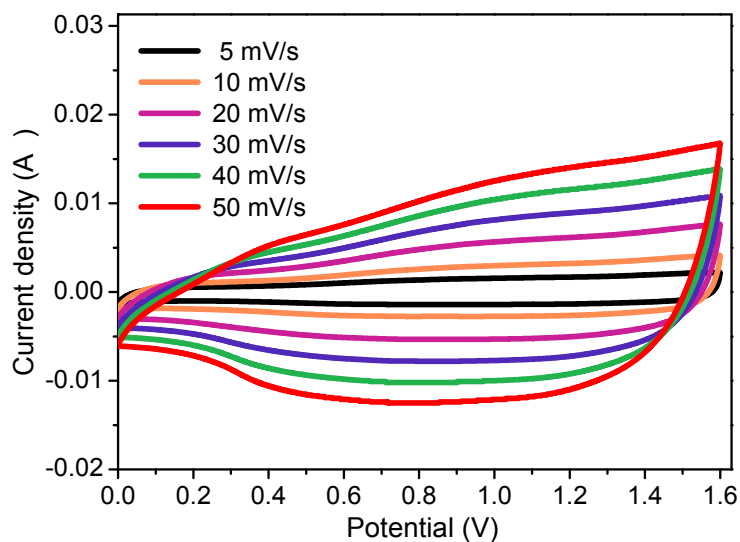

**Figure S7.** The CV curves of  $\text{Ni}_3(\text{PO}_4)_2 \cdot 8\text{H}_2\text{O}/\text{C}$  (15 LN) at scan rates of 5, 10, 20, 30, 40 and  $50 \text{ mV s}^{-1}$ .

Figure S7 shows the CV curves of  $\text{Ni}_3(\text{PO}_4)_2 \cdot 8\text{H}_2\text{O}/\text{C}$  (15 LN) full device at different scan rates within a cell voltage window of 0-1.6 V. The quasi-rectangular shapes of these CV curves demonstrate the dominant capacitive behavior rather than battery characteristics. The CV curves retain the same shape with increasing scan rate, which exhibited a good rate capability of the hybrid supercapattery.

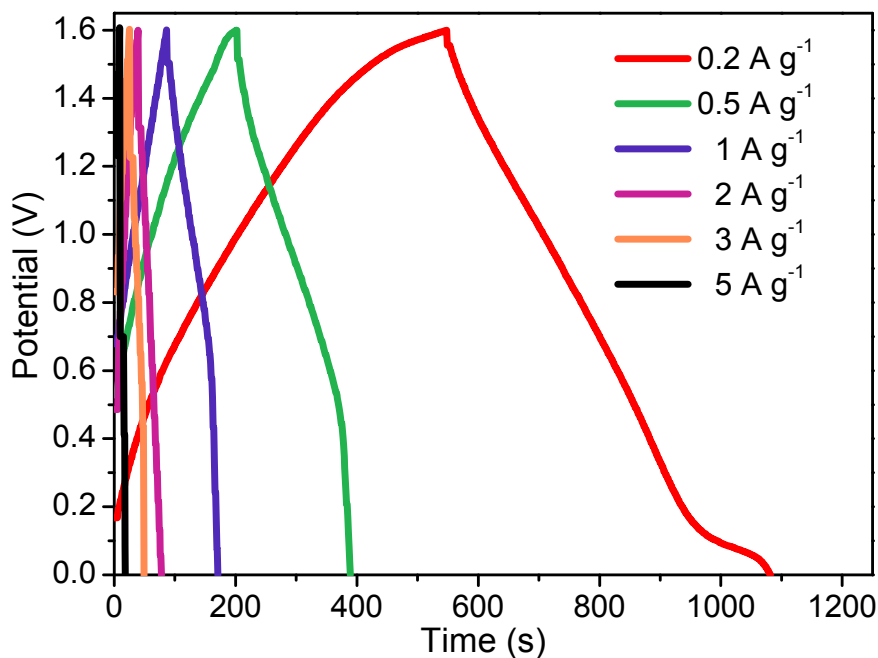

**Figure S8.** The galvanostatic charge-discharge curves of  $\text{Ni}_3(\text{PO}_4)_2 \cdot 8\text{H}_2\text{O} // \text{C}$  (0.5 LN) at the current densities of 0.2, 0.5, 1, 2, 3 and 5  $\text{A g}^{-1}$ .

Figure S8 shows the charge-discharge curves of the  $\text{Ni}_3(\text{PO}_4)_2 \cdot 8\text{H}_2\text{O} // \text{C}$  (0.5 LN) supercapattery at different current densities with a cell voltage up to 1.6 V. Quasi-lined charge and discharge curves rather than potential plateaus confirm the capacitive characteristic of the hybrid supercapattery.

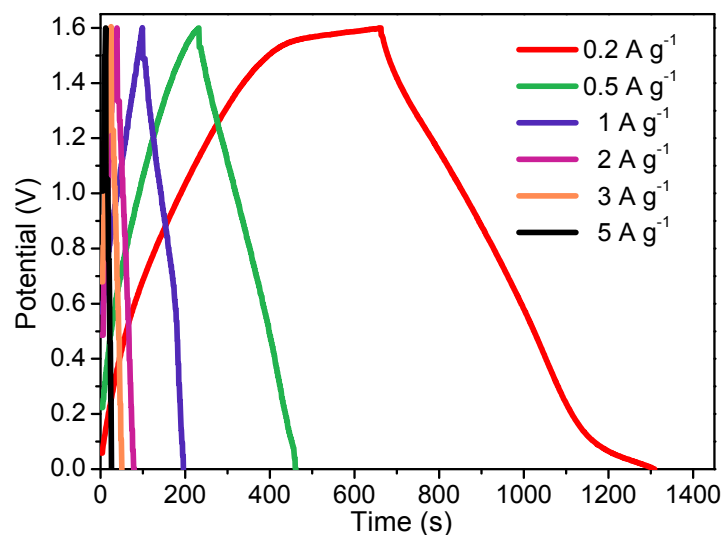

**Figure S9.** The galvanostatic charge-discharge curves of  $\text{Ni}_3(\text{PO}_4)_2 \cdot 8\text{H}_2\text{O}/\text{C}$  (3 LN) at the current densities of 0.2, 0.5, 1, 2, 3 and 5  $\text{A g}^{-1}$ .

Figure S9 shows the charge-discharge curves of the  $\text{Ni}_3(\text{PO}_4)_2 \cdot 8\text{H}_2\text{O}/\text{C}$  (3 LN) supercapattery at different current densities with a cell voltage up to 1.6 V. Quasi-lined charge and discharge curves rather than potential plateaus confirm the capacitive characteristic of the hybrid supercapattery.

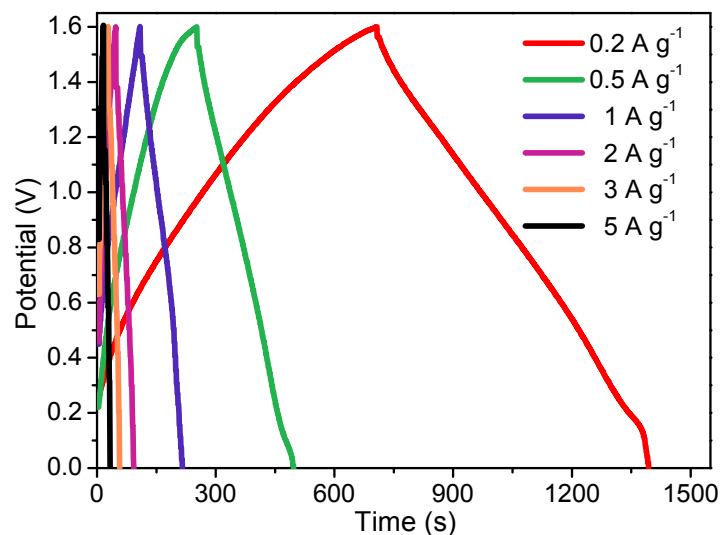

**Figure S10.** The galvanostatic charge-discharge curves of  $\text{Ni}_3(\text{PO}_4)_2 \cdot 8\text{H}_2\text{O} // \text{C}$  (6 LN) at the current densities of 0.2, 0.5, 1, 2, 3 and 5  $\text{A g}^{-1}$ .

Figure S10 shows the charge-discharge curves of the  $\text{Ni}_3(\text{PO}_4)_2 \cdot 8\text{H}_2\text{O} // \text{C}$  (6 LN) supercapattery at different current densities with a cell voltage up to 1.6 V. Quasi-lined charge and discharge curves rather than potential plateaus confirm the capacitive characteristic of the hybrid supercapattery.

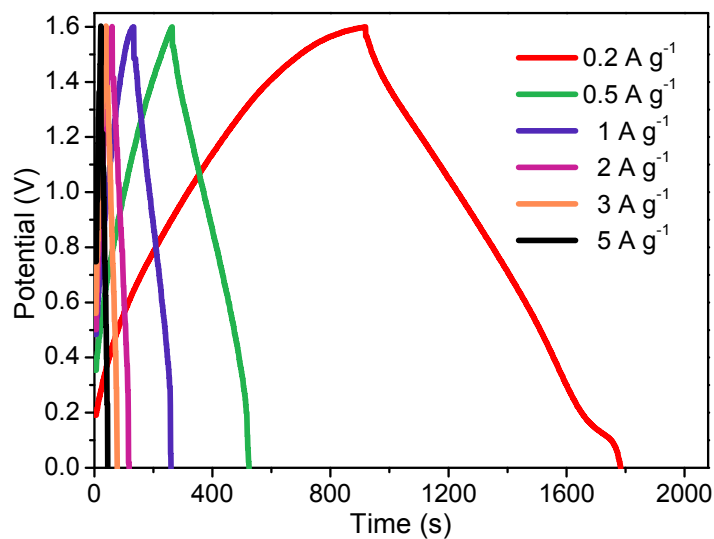

**Figure S11.** The galvanostatic charge-discharge curves of  $Ni_3(PO_4)_2 \cdot 8H_2O//C$  (9 LN) at the current densities of 0.2, 0.5, 1, 2, 3 and 5  $A\ g^{-1}$ .

Figure S11 shows the charge-discharge curves of the  $Ni_3(PO_4)_2 \cdot 8H_2O//C$  (9 LN) supercapattery at different current densities with a cell voltage up to 1.6 V. Quasi-lined charge and discharge curves rather than potential plateaus confirm the capacitive characteristic of the hybrid supercapattery.

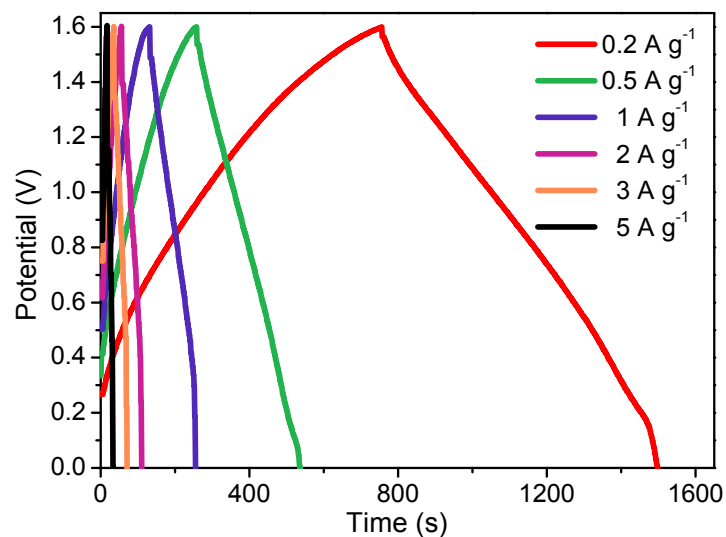

**Figure S12.** The galvanostatic charge-discharge curves of  $Ni_3(PO_4)_2 \cdot 8H_2O//C$  (15 LN) at the current densities of 0.2, 0.5, 1, 2, 3 and 5  $A\ g^{-1}$ .

Figure S12 shows the charge-discharge curves of the  $Ni_3(PO_4)_2 \cdot 8H_2O//C$  (15 LN) supercapattery at different current densities with a cell voltage up to 1.6 V. Quasi-lined charge and discharge curves rather than potential plateaus confirm the capacitive characteristic of the hybrid supercapattery.

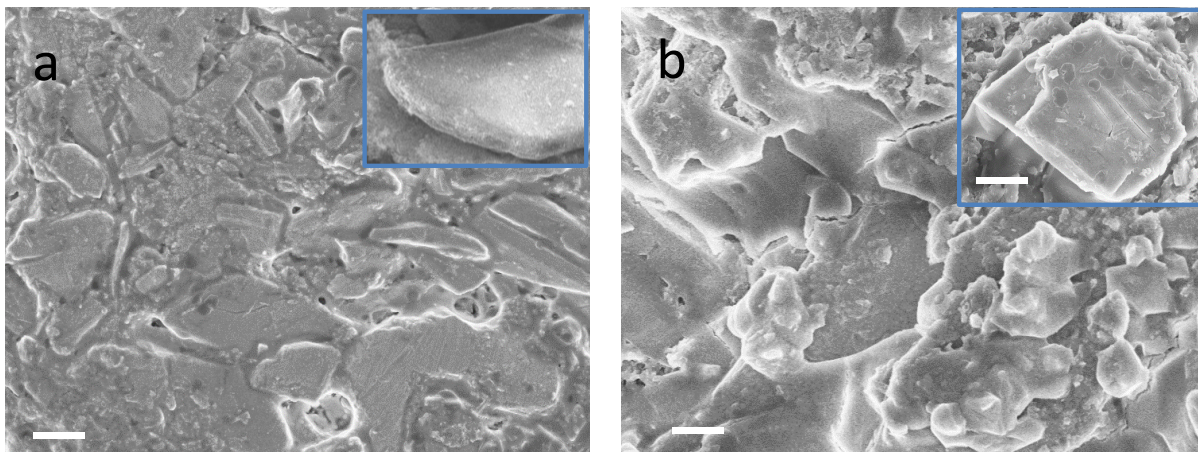

**Figure S13.** (a-b) SEM images of the nickel phosphate before and after charging/discharging for 8000 cycles. Scale bars are 20  $\mu\text{m}$  for (a) and 10  $\mu\text{m}$  for (b).

The capacity decreased gradually when the charge discharge cycling test continued, which may result from the changes in the structures of the active electrode materials during the long cycling period. The expansion and shrinkage of the composite electrode upon insertion/desertion of anion ion ( $\text{OH}^-$ ) of electrolyte into the nickel phosphate lamination, leading to the decomposition and/or loss of the active materials and the crack between the electrode and the current collect, would have a great influence on the cycling life and stability.

Table S1. Cycling stability of half cells with 12 LN  $\text{Ni}_3(\text{PO}_4)_2 \cdot 8\text{H}_2\text{O}$  and recently reported values for comparison.

| Electrode materials                                                                                                                                                    | Current density (A g) | Capacitance ( $\text{F g}^{-1}$ ) | Capacity ( $\text{C g}^{-1}$ ) | Retention                                      | Reference |
|------------------------------------------------------------------------------------------------------------------------------------------------------------------------|-----------------------|-----------------------------------|--------------------------------|------------------------------------------------|-----------|
| $\text{Ni}_3(\text{PO}_4)_2 \cdot 8\text{H}_2\text{O}$                                                                                                                 | 2                     | 1053                              | 473.9                          | 93% after 2000 cycles<br>89% after 5000 cycles | This work |
| $\text{Co}_{11}(\text{HPO}_3)_8(\text{OH})_6$                                                                                                                          | 1.25                  | 312                               | Not mention                    | 89.4% after 3000 cycles                        | 24        |
| $\text{Mn}_3(\text{PO}_4)_2$                                                                                                                                           | 0.5                   | 194                               | Not mention                    | 88.9% after 10000 cycles                       | 25        |
| $\text{NH}_4\text{CoPO}_4 \cdot \text{H}_2\text{O}$                                                                                                                    | 0.625                 | 369.4                             | Not mention                    | 99.7% after 400 cycles                         | 26        |
| $\text{Ni}_3(\text{PO}_4)_2 \cdot 8\text{H}_2\text{O}$                                                                                                                 | 2                     | 1301                              | Not mention                    | 83.59% after 1000 cycles                       | 27        |
| $\text{CoHPO}_4 \cdot 3\text{H}_2\text{O}$                                                                                                                             | 1.5                   | 413                               | Not mention                    | 85.1% after 3000 cycles                        | 28        |
| Hybrid material of $(\text{Ni},\text{Co})_3(\text{PO}_4)_2 \cdot 8\text{H}_2\text{O}$ and $(\text{NH}_4)(\text{Ni},\text{Co})\text{PO}_4 \cdot 0.67\text{H}_2\text{O}$ | 0.5                   | 1128                              | Not mention                    | Not mention                                    | 29        |
| $\text{MOF-Ni}_x\text{P}_y\text{O}_2$                                                                                                                                  | 1                     | 1627                              | Not mention                    | 76.82% after 1000 cycles                       | 30        |
| $\text{Co}_3(\text{PO}_4)_2 \cdot 8\text{H}_2\text{O}$                                                                                                                 | 1                     | 350                               | Not mention                    | 1A/g<br>102% after 1000 cycles                 | 31        |
| $\text{NiCo}_2(\text{PO}_4)_2$                                                                                                                                         | 2                     | 918.14                            | Not mention                    | 84.5% after 1000 cycles                        | 32        |
| $\text{Ni}_3\text{P}_2\text{O}_8$                                                                                                                                      | 0.5                   | 1464                              | Not mention                    | 84% after 1000 cycles                          | 33        |



**Table S2** Cycling stability of  $\text{Ni}_3(\text{PO}_4)_2 \cdot 8\text{H}_2\text{O} // \text{AC}$  and recently reported values for comparison

| Positive electrode materials                                            | Negative electrode materials                                | Current density (A g) | Capacitance ( $\text{F g}^{-1}$ ) | Retention                | Reference |
|-------------------------------------------------------------------------|-------------------------------------------------------------|-----------------------|-----------------------------------|--------------------------|-----------|
| $\text{Ni}_3(\text{PO}_4)_2 \cdot 8\text{H}_2\text{O}$                  | Activated carbon                                            | 0.2                   | 118                               | 94% after 8000 cycles    | This work |
| $\text{Ni}_3(\text{PO}_4)_2 / \text{RGO} / \text{Co}_3(\text{PO}_4)_2$  | Activated carbon                                            | 0.12                  | 115.4                             | 91.9% after 18000 cycles | 36        |
| $\text{Co}_3(\text{PO}_4)_2 \cdot 8\text{H}_2\text{O}$                  | Activated carbon                                            | 5 mA $\text{cm}^{-2}$ | 111.2                             | 77.9% after 1000 cycles  | 40        |
| Nickel-cobalt phosphate composite                                       | Activated carbon                                            | 1                     | 162.8                             | 80.4% after 5000 cycles  | 41        |
| $\text{Co}_{0.2}\text{Ni}_{0.8}$ pyrophosphate                          | Activated carbon                                            | 1                     | 119                               | 80% after 2000 cycles    | 42        |
| $\text{Ni}_2\text{P}_2\text{O}_7$                                       | highly porous graphitic carbon                              | 1                     | 183                               | 83% after 2000 cycles    | 43        |
| $\text{Ni}_3\text{P}_2\text{O}_8$                                       | $\text{Fe}_3\text{P}_2\text{O}_8 \cdot 8\text{H}_2\text{O}$ | 0.5                   | 94                                | 81% after 10000 cycles   | 33        |
| $\text{Mn}_3(\text{PO}_4)_2$                                            | Activated carbon                                            | 0.5                   | 41.9                              | 92% after 8000 cycles    | 25        |
| $\text{NH}_4\text{CoNiP}$                                               | hierarchical porous carbon                                  | 0.2                   | 76                                | 95.6% after 5000 cycles  | 29        |
| $\text{KCo}_{0.33}\text{Ni}_{0.67}\text{PO}_4 \cdot \text{H}_2\text{O}$ | Activated carbon                                            | 1.5                   | 227                               | 96% after 5000 cycles    | 44        |
| $\text{Mn}_3(\text{PO}_4)_2$                                            | Activated carbon                                            | 0.5                   | 28                                | 96% after 10000 cycles   | 45        |
